# Supplementary material
Source: PubMed Central journal article supplement (PMC4143410)

## **Supplemental Material to:**

**Ekaterina S Gushchanskaya, Artem V Artemov,  
Sergey V Ulyanov, Maria D Logacheva, Aleksey A Penin,  
Elena S Kotova, Sergey B Akopov, Lev G Nikolaev,  
Olga V Iarovaia Eugene D Sverdlov, Alexey A Gavrilov,  
and Sergey V Razin**

**The clustering of CpG islands may constitute an important  
determinant of the 3D organization of interphase  
chromosomes**

**Epigenetics 2014; 9(7)**

**<http://dx.doi.org/10.4161/epi.28794>**

**[http://www.landesbioscience.com/journals/epigenetics/  
article/28794/](http://www.landesbioscience.com/journals/epigenetics/article/28794/)**

## SUPPLEMENTARY TABLES

**Table S1. The reference bait-originated subsequences for the 4C anchors.** These sequences appeared at the beginning of the 4C reads before the *Hind*III restriction sites and originated from the anchor DNA fragments. The sequences were trimmed (see Material and Methods).

| Anchor   | Reference sequence                             |
|----------|------------------------------------------------|
| TSR3     | CACTCATCTCCCCGTA CTTTGCCCTAATTCCTCAAGCTT       |
| GENE-Des | AATTTGTGAAGCAGTTGTATGTAGTCAGCAACAGAAGTACAAGCTT |
| NPRL3    | GCCAGGATATAGATTCTGCTTTTAAGCTT                  |
| TRAP1    | CCAGAGATTCTCAAATCACAGCACAGAAGCTT               |
| PPL      | AAAGCATCTCCTCTCCCTGAAGAGCAGAGAGCGGCTCCAAAGCTT  |

## SUPPLEMENTARY FIGURE LEGENDS

**Figure S1. Scatterplots and box-plots showing the relationships between the TSR3 4C signal (y-axis) in HD3 cells and the densities of various genomic features (x-axis).** (A-G) The correlation of the TSR3 4C signal with the CGI density (A), Sp1 motifs (B), CTCF motifs (C), CTCF deposition sites, as determined by ChIP-Seq (D), NF-E2 binding motifs (E), GATA1 binding motifs (F), and G-quadruplex motifs (G) is shown. Other designations are as in Figure 3.

**Figure S2. Scatterplots and box-plots showing the relationships between the GENE-Des 4C signal (y-axis) in HD3 cells and the densities of various genomic features (x-axis).** (A-G) The correlation of the GENE-Des 4C signal with the CGI density (A), Sp1 motifs (B), CTCF motifs (C), CTCF deposition sites, as determined by ChIP-Seq (D), NF-E2 binding motifs (E), GATA1 binding motifs (F), and G-quadruplex motifs (G) is shown. Other designations are as in Figure 3.

**Figure S3. Scatterplots and box-plots showing the relationships between the TRAP1 4C signal (y-axis) in HD3 cells and the densities of various genomic features (x-axis).** (A-G) The correlation of the TRAP1 4C signal with the CGI density (A), Sp1 motifs (B), CTCF motifs (C),

CTCF deposition sites, as determined by ChIP-Seq (D), NF-E2 binding motifs (E), GATA1 binding motifs (F), and G-quadruplex motifs (G) is shown. Other designations are as in Figure 3.

**Figure S4. Scatterplots and box-plots showing the relationships between the PPL 4C signal (y-axis) in HD3 cells and the densities of various genomic features (x-axis).** (A-G) The correlation of the PPL 4C signal with the CGI density (A), Sp1 motifs (B), CTCF motifs (C), CTCF deposition sites, as determined by ChIP-Seq (D), NF-E2 binding motifs (E), GATA1 binding motifs (F), and G-quadruplex motifs (G) is shown. Other designations are as in Figure 3.

**Figure S5. Distribution of the CTCF deposition sites in the upstream area of the chicken c-myc gene.** The figure demonstrates the position of the CTCF binding site reported by Lobanenkov et al (site V)<sup>78</sup> and CTCF binding sites found in our ChIP-Seq experiments (shown are the raw data of the ChIP-Seq analysis and CTCF deposition peaks identified as described in Material and Methods); visualization in the UCSC browser. Genomic coordinates are according to the galGal4 assembly.

# SUPPLEMENTARY FIGURES

## Figure S1

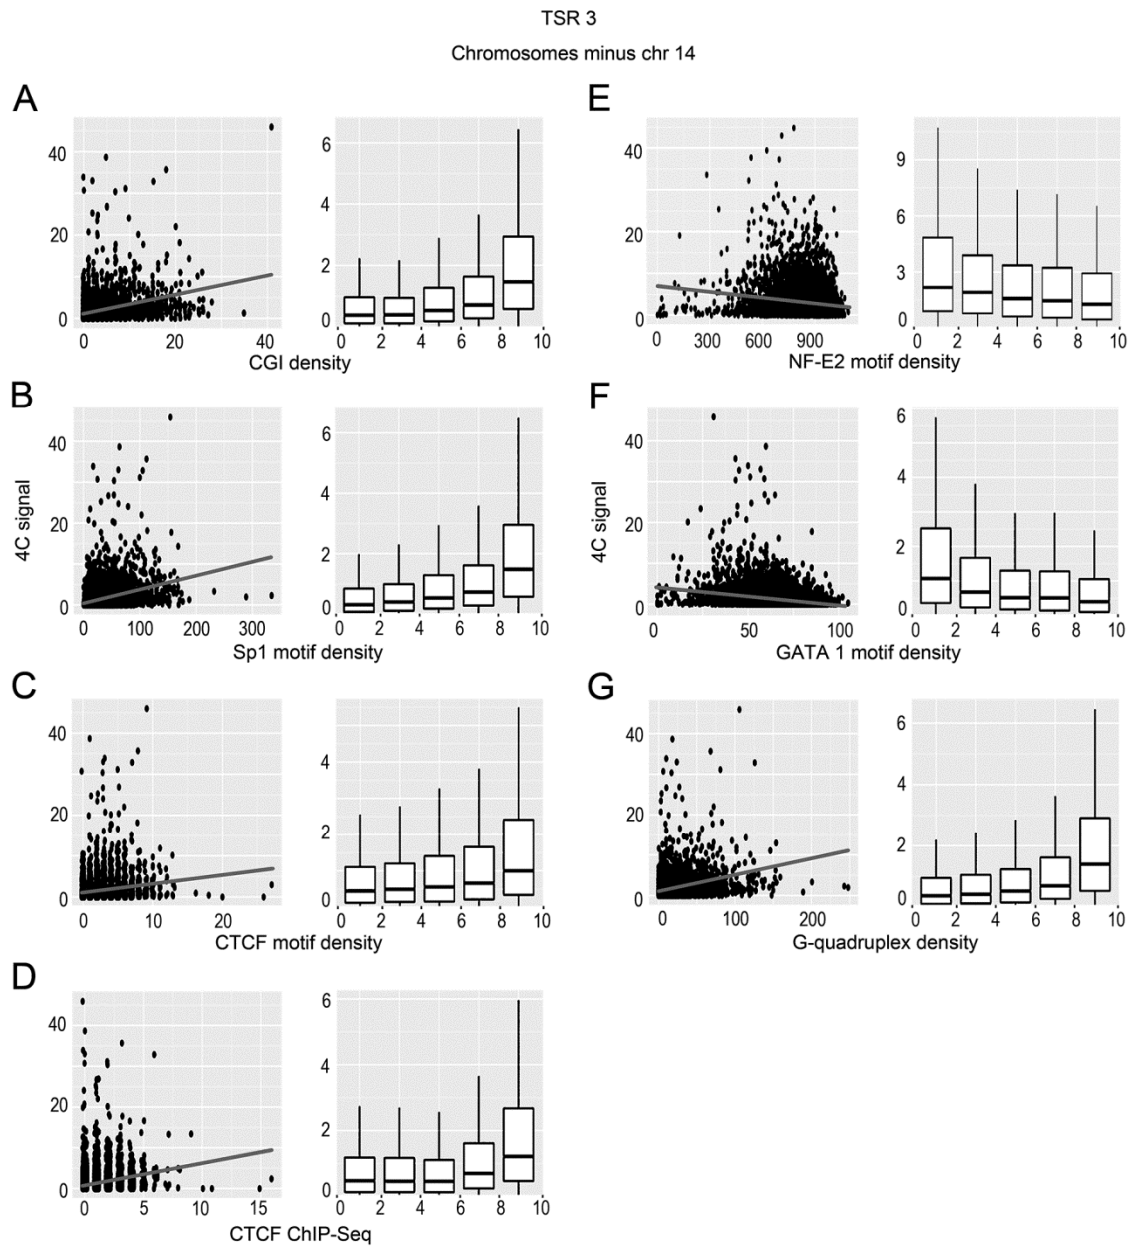

Figure S2

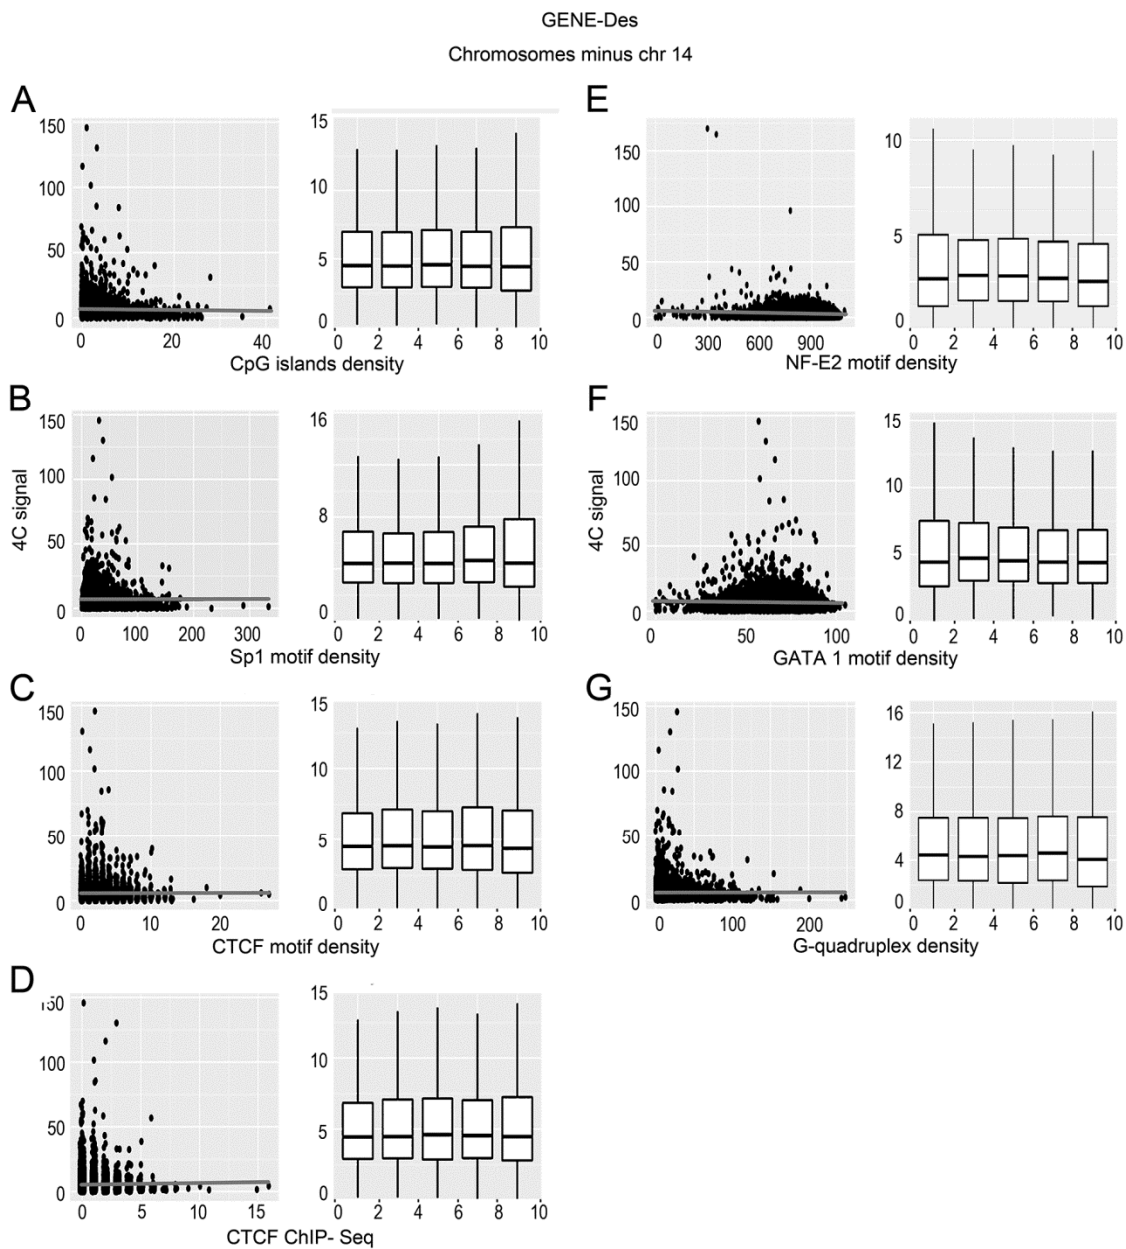

Figure S3

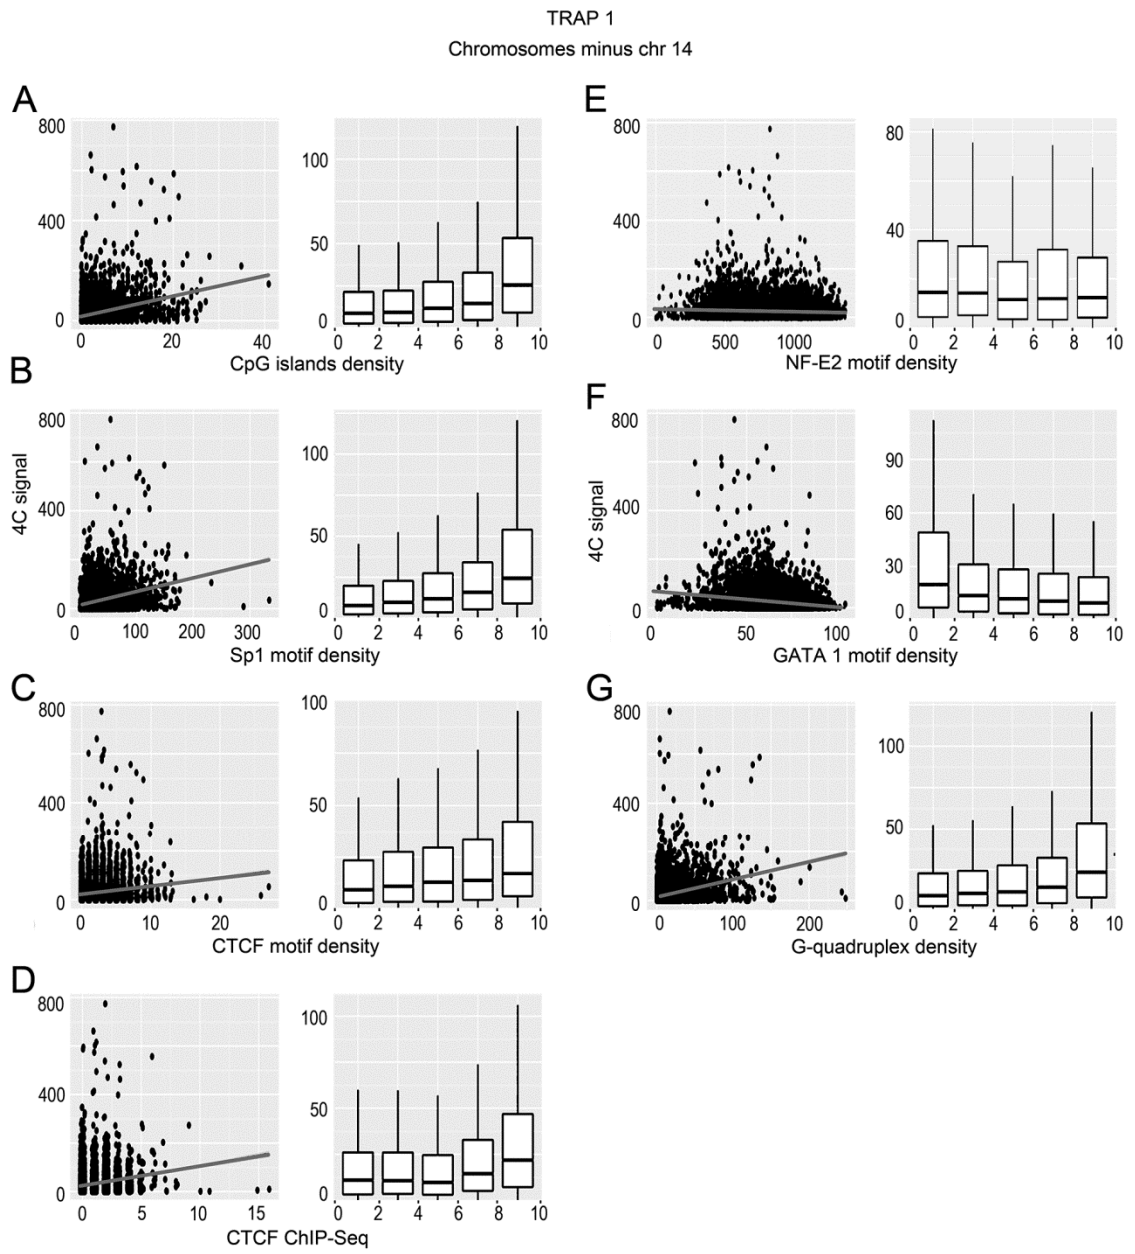

Figure S4

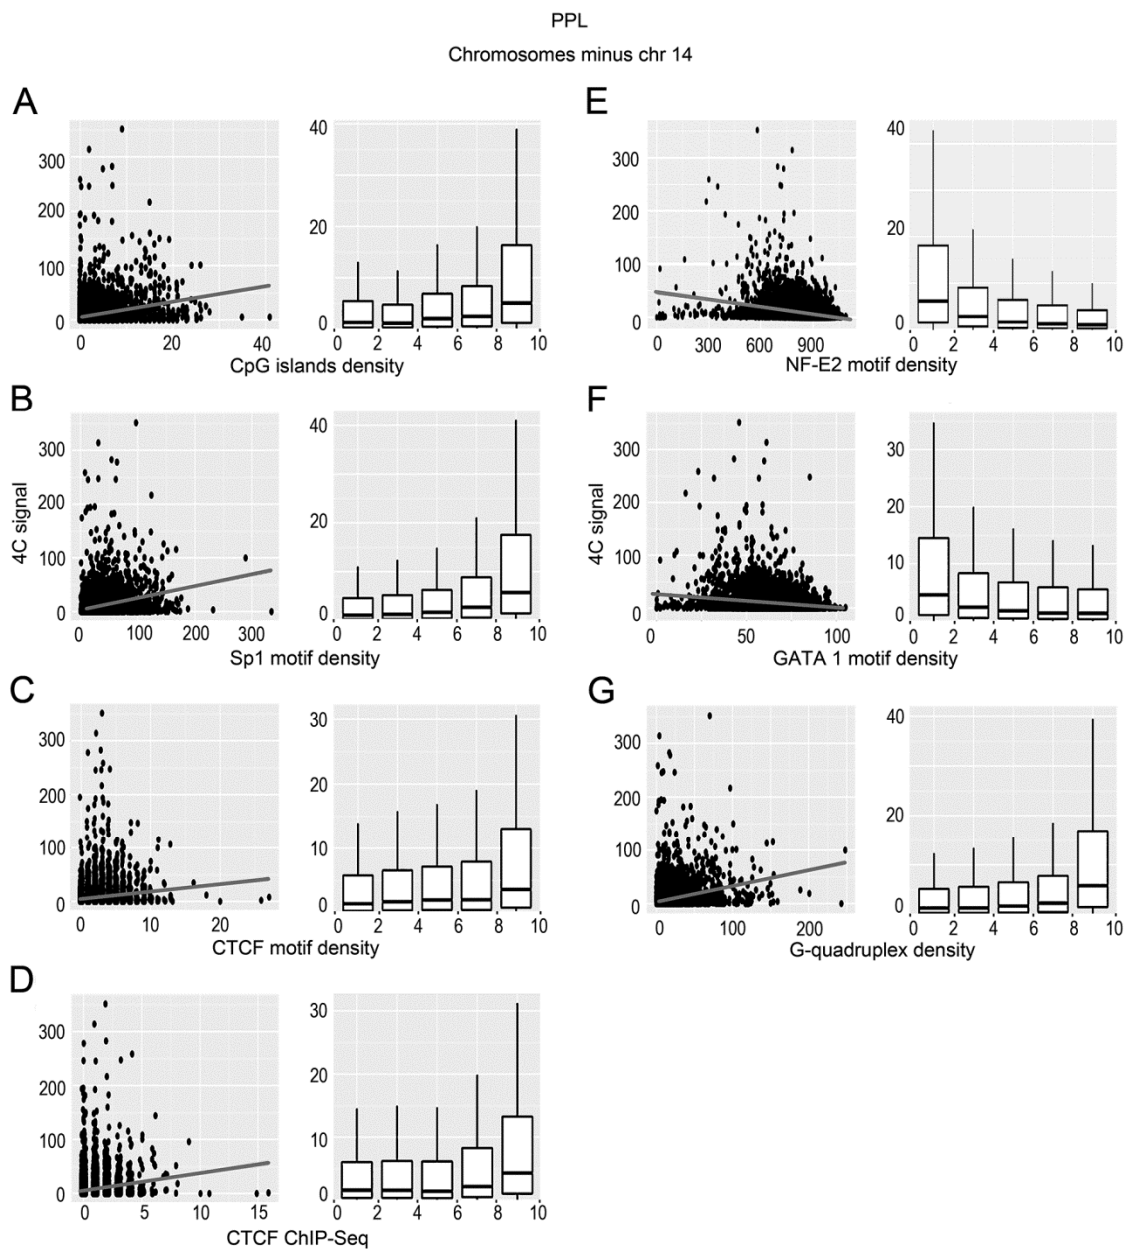

**Figure S5**

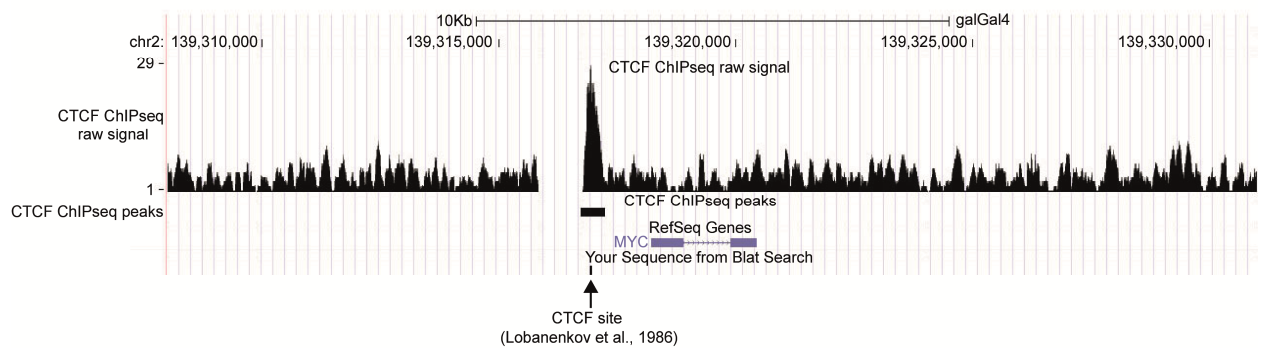

Supplement: epi-9-951-s01.pdf [file epi-9-951-s01.pdf]
